# Hybrid Clustering of Long and Short-read for Improved Metagenome Assembly

Yakang Lu<sup>1,†</sup>, Lizhen Shi<sup>2,†</sup>, Marc W. Van Goethem<sup>3</sup>, Volkan Sevim<sup>4</sup>, Michael Mascagni<sup>2,5</sup>, Li Deng<sup>1,\*</sup> and Zhong Wang<sup>3,4,6,\*</sup>

<sup>1</sup>*School of Mechatronic Engineering and Automation, Shanghai University, Shanghai 200444, China,* <sup>2</sup>*Department of Computer Science, Florida State University, Tallahassee, FL 32306, United States,* <sup>3</sup>*Environmental Genomics and Systems Biology Division, Lawrence Berkeley National Laboratory, Berkeley, CA 94720, United States,* <sup>4</sup>*Department of Energy Joint Genome Institute, Berkeley, CA 94720, California, United States,* <sup>5</sup>*Applied and Computational Mathematics Division, National Institute of Standards and Technology, Gaithersburg, MD 20899, United States,* <sup>6</sup>*School of Natural Sciences, University of California at Merced, Merced, CA 95343, United States*

<sup>†</sup> *These authors have contributed equally to this work.*

Correspondence\*:  
Zhong Wang  
[zhongwang@lbl.gov](mailto:zhongwang@lbl.gov)

Li Deng  
[dengli@shu.edu.cn](mailto:dengli@shu.edu.cn)

## 2 ABSTRACT

3 Next-generation sequencing has enabled metagenomics, the study of the genomes of  
4 microorganisms sampled directly from the environment without cultivation. We previously  
5 developed a proof-of-concept, scalable metagenome clustering algorithm based on Apache  
6 Spark to cluster sequence reads according to their species of origin. To overcome its under-  
7 clustering problem on short-read sequences, in this study we developed a new, two-step Label  
8 Propagation Algorithm (LPA) that first forms clusters of long reads and then recruits short reads  
9 to these clusters. Compared to alternative label propagation strategies, this hybrid clustering  
10 algorithm (hybrid-LPA) yields significantly larger read clusters without compromising cluster purity.  
11 We show that adding an extra clustering step before assembly leads to improved metagenome  
12 assemblies, predicting more complete genomes or gene clusters from a synthetic metagenome  
13 dataset and a real-world metagenome dataset, respectively. These results suggest that hybrid-  
14 LPA is a good alternative to current metagenome assembly practice by providing benefits in both  
15 scalability and accuracy on large metagenome datasets.

16

### 17 **Availability and implementation:**

18 [https://bitbucket.org/zhong\\_wang/hybridlpa/src/master/](https://bitbucket.org/zhong_wang/hybridlpa/src/master/).

19 **Contact:** [zhongwang@lbl.gov](mailto:zhongwang@lbl.gov)

20 **Keywords:** Next-generation sequencing, hybrid metagenome clustering, Label Propagation Algorithm, metagenome assembly, PacBio  
21 sequencing, Oxford Nanopore sequencing

## 1 INTRODUCTION

22 Metagenomics offers a fast track to directly study the microbial communities in their natural habitat without  
23 laboratory cultivation (Tyson et al., 2004; Hugenholtz and Tyson, 2008). Next-generation DNA sequencing  
24 (NGS) technologies have greatly expedited metagenomic discoveries, yielding deep insights into the  
25 composition, structure, and dynamics of complex microbial communities (Arumugam et al., 2011; Hess  
26 et al., 2011; Xu, 2006). Driven by the rapid development of NGS experimental technologies and modern,  
27 scalable metagenome assemblers, large numbers of individual microbial genomes can now be readily  
28 assembled from a single experiment or from meta-analyses constituting large cohorts of metagenomic  
29 datasets (Stewart et al., 2019; Parks et al., 2017; Nayfach et al., 2020). Currently, the Illumina Sequencing  
30 Platform is the predominant NGS platform for metagenome sequencing due to its high-throughput, low-  
31 cost, and high accuracy (average error rate  $<1\%$ ), despite that its short read length creates limitations on  
32 some downstream analysis tasks such as gene discovery (Wommack et al., 2008), read classification, or  
33 genome assembly (Breitwieser et al., 2019). To overcome these limitations, various strategies have been  
34 developed to either create synthetic long reads by assembly (Zimin et al., 2013) or experimentally (such  
35 as Moleculo, White et al. (2016)), but these methods bring additional experimental and/or computational  
36 costs.

37 Single-molecule, long-read sequencing technologies developed by Pacific Biosciences (PacBio, Eid et al.  
38 (2009)) and Oxford Nanopore Technologies (ONT, Schneider and Dekker (2012)) have been successfully  
39 applied to single-genome sequencing projects, yielding very high-quality genome assemblies from microbes  
40 to human (Chin et al., 2013; Koren and Phillippy, 2015; Logsdon et al., 2020; Sevim et al., 2019). These  
41 long reads, up to 100kb in length, can effectively resolve large repeats or structural variations that  
42 pose challenges to short-read based assemblers. Long-read sequencing has not been widely adopted in  
43 metagenome sequencing, however, mainly because of two reasons. Firstly, PacBio and ONT long reads  
44 have error rates as high as 30% (Eid et al., 2009; Schneider and Dekker, 2012). These errors, predominantly  
45 small insertions and deletions (indels), make the assembly process difficult and error-prone if they are not  
46 corrected. Secondly, compared with short-read sequencing, these technologies, when applied to complex  
47 metagenome projects, incur higher costs and lower throughput.

48 Recently, hybrid approaches have emerged to take advantage of the complementary characteristics of short  
49 and long-read sequencing technologies. Combining the high accuracy of short-read sequencing and the  
50 high read length of long-read sequencing, some genome assemblers such as Unicycler (Wick et al., 2017)  
51 and hybridSPAdes (Dmitry et al., 2016) showed promising results for single-genome assembly. However,  
52 most popular metagenome assemblers, including MEGAHIT (Li et al., 2015), MetaSPAdes (Nurk et al.,  
53 2017) and MetaHipmer (Hofmeyr et al., 2020), do not support hybrid assembly yet. The feasibility and  
54 potential benefits of a hybrid strategy in metagenome assembly were recently demonstrated by leveraging  
55 long reads for a second-round assembly of contigs from those metagenome assemblers (Bertrand et al.,  
56 2019).

57 We previously developed a scalable metagenome clustering tool called SpaRC (Shi et al., 2018; Li et al.,  
58 2020) based on Apache Spark. SpaRC can form pure and complete clusters with long-read sequencing  
59 technologies. However, it tends to produce a large number of small clusters on short-read datasets (under-  
60 clustering) unless multiple samples from the same community are available. To illustrate this point, Table 1  
61 shows the results of running SpaRC on two short-read datasets, each derived from a single sample of a  
62 synthetic microbial community: BMock12 (Sevim et al., 2019) and CAMI2 Simulated Toy Human Gut  
63 Metagenome (Sczyrba et al., 2017; Bremges and McHardy, 2018). In both experiments, SpaRC generated  
64 pure clusters but their completeness was very low.

**Table 1. Clustering Performance on Single-sample, Short-read, Synthetic Metagenome Datasets**

|                              | # reads     | # clusters | Median Purity | Median Completeness |
|------------------------------|-------------|------------|---------------|---------------------|
| BMock12                      | 10,517,108  | 79,915     | 100           | 0.29                |
| CAMI2 Simulated<br>Toy Human | 296,027,232 | 1,347,826  | 100           | 11.62               |

65 Motivated by the success of the above mentioned hybrid assemblers, in this study we explored a hybrid  
66 approach for metagenome read clustering to overcome the under-clustering problem of SpaRC. As SpaRC's  
67 core algorithm is based on the Label Propagation Algorithm (LPA), we first experimented three alternative  
68 label propagation strategies after long reads were added. Next, we explored the effect of using different  
69 proportions of long reads since long-read sequencing is relatively more costly. We also compared hybrid  
70 clustering performance of long-read datasets from both PacBio and ONT platforms. Finally, we evaluated  
71 the impact of hybrid clustering on downstream genome assembly and gene-cluster discovery performance,  
72 using a synthetic and a real-world metagenome dataset, respectively.

## 2 MATERIALS AND METHODS

### 73 2.1 The Hybrid-LPA algorithm

74 SpaRC uses Label Propagation Algorithm (LPA) originally proposed by Raghavan (Raghavan et al.,  
75 2007) to partition the read graph (Shi et al., 2018). Briefly, the algorithm begins by initializing each read  
76 with a unique label, followed by iteratively updating the label of each node to the label of the majority of  
77 its neighbors. After several iterations or until no further label propagation is possible, densely connected  
78 groups of reads are partitioned into clusters. LPA is capable of resolving genomes with shared reads and  
79 has near linear computational performance. SpaRC can be run at two different modes: "local mode" only  
80 cluster reads based on their overlap, while "global mode" further clusters the results from local mode based  
81 on multiple sample statistics (Li et al., 2020).

82 Here we explored three strategies for hybrid clustering with both long- and short-reads (Figure 1A):

- 83 • In the first "additive" strategy (S1), cluster labels can only propagate among long reads or among short  
84 reads, respectively. No propagation is allowed between long and short reads. This was done by running  
85 SpaRC at local clustering mode separately on the short-read and long-read datasets, and then combine  
86 the clustering results.
- 87 • In the second "mixed" strategy (S2), labels are allowed to propagate among both long and short reads  
88 indiscriminately: labels can propagate from long to long, short to short, long to short or *vice versa*.  
89 This was done by first combining the short- and long-read datasets, followed by running SpaRC at  
90 local clustering mode.
- 91 • In the third "long-then-short" strategy (S3), initially labels are only allowed to propagate among long  
92 reads. After all long reads finish updating their labels, their labels are allowed to propagate to short  
93 reads. This new algorithm, hereafter referred as hybrid-LPA, was implemented in both MPI and UPC++  
94 in order to fit different HPC environments.

### 95 2.2 Datasets and Data Preprocessing

96 The BMock12 (Sevim et al., 2019) dataset was derived from a mock community that consists of 12  
97 bacterial strains with genome sizes ranging 3.2 to 7.2 Mbp. One of the bacterial species in the set, *M.*  
98 *coxensis*, has a negligible number of reads in the dataset, therefore, BMock12 effectively contains 11  
99 bacterial strains. The reads from BMock12 were downloaded from the NCBI Sequence Read Archive

**Table 2. Sequencing data statistics**

| Dataset  | Statistics    | Illumina       | ONT           | PacBio          |
|----------|---------------|----------------|---------------|-----------------|
| BMock12  | #Reads        | 211,448,444    | 187,507       | 389,806         |
|          | #Bases        | 63,384,840,109 | 3,737,495,058 | 2,583,337,248   |
|          | Max Length    | 301            | 145,720       | 45,165          |
|          | Min Length    | 301            | 120           | 50              |
|          | Avg Length    | 301            | 19,932.6      | 6,627.2         |
|          | Median Length | 301            | 17,900        | 5,800           |
|          | Std.Dev       | /              | 11,225.3      | 4,283.2         |
| Biocrust | #Reads        | 141,172,036    | /             | 20,042,887      |
|          | #Bases        | 37,368,694,112 | /             | 111,977,437,956 |
|          | Max Length    | 301            | /             | 138,853         |
|          | Min Length    | 35             | /             | 50              |
|          | Avg Length    | 264.7          | /             | 5586.9          |
|          | Median Length | 301            | /             | 5427            |
|          | Std.Dev       | 51.5           | /             | 3,324.0         |

100 (SRA) using accessions SRX4901586 (ONT), SRX4901584 (PacBio set 1), SRX4901585 (PacBio set  
101 2), and SRX4901583 (Illumina). Table 2 lists the statistics of these datasets. The Illumina short-read  
102 dataset from this community was pair-end sequenced at 150bp. The two ends were concatenated by an "N"  
103 (resulting a 301bp fragment) before being fed into SpaRC. In this paper, we took 5% of the reads from the  
104 original dataset to conduct the experiments.

105 The Biocrust dataset was derived from a biological soil crust sample collected from Moab, UT, USA.  
106 Biocrusts are specialized microbial communities consisting of primary producers, such as cyanobacteria,  
107 mosses, and lichens, and associated heterotrophs. They are aggregated organosedimentary communities that  
108 colonize and stabilize the soil surfaces of arid environments, preventing soil erosion and promoting nutrient  
109 status by fixing both atmospheric carbon and nitrogen (Van Goethem et al., 2021). The two ends of a  
110 Illumina short-read pair are 151 and 150bp. The two ends were merged by BBMerge (Bushnell et al., 2017).  
111 The merged Illumina reads, as well as the PacBio reads, were masked for low-complexity sequences by  
112 BBDuk using default parameters ([sourceforge.net/projects/bbmap/](https://sourceforge.net/projects/bbmap/)). The resulting fragments  
113 were used as input for SpaRC.

114

### 115 2.3 Running SpaRC and Hybrid-LPA

116 Small-scale experiments in this work were performed on the Amazon Web Services (AWS) Cloud.  
117 Apache Spark (ver 2.3.1) services and Hadoop (ver 2.8.4) are provided by the Elastic MapReduce (EMR)  
118 on AWS. Specifically, we first used SpaRC to generate read graphs (EMR, emr-5.17.0). Then we used one  
119 node (r4.16xlarge) with 64 CPU cores and 488GB memory to run hybrid-LPA. On the EMR cluster, one  
120 node is used as the master and all other nodes (r4.2xlarge) are used as workers. Depending on the size of  
121 the input datasets, various number of workers are used (20 workers for BMock12 and 200 for the Biocrust  
122 dataset).

123 Large-scale experiments were performed on Berkeley Lab's High-performance Computing system  
124 (Lawrencium, <https://sites.google.com/a/lbl.gov/hpc/>) and Department of Energy's  
125 National Energy Research Scientific Computing Center (NERSC, <https://www.nersc.gov/>). In  
126 these environments, SpaRC jobs were run on standalone Spark clusters created on-demand. Specifically,  
127 600 Cori KNL nodes (each has 68 physical cores and 96 GB of memory) on NERSC were used for the  
128 Biocrust dataset.

## 129 **2.4 Metagenome Assembly and Binning, Biosynthetic Gene Cluster Prediction**

130 For the BMock12 dataset, each cluster from the hybrid-LPA output was assembled by metaSPAdes (ver  
131 3.13.1) using default parameters (Nurk et al., 2017). Contigs from all clusters were combined for binning  
132 with MetaBAT 2 (Kang et al., 2019) using default parameters. In the assembly-only method, raw reads  
133 were assembled with metaSPAdes followed by binning with MetaBAT 2. MetaQuast (version 5.0.2) was  
134 used to evaluate assembly quality for both two methods (Mikheenko et al., 2016).

135 From the assembled biocrust metagenomes (performed using metaSPAdes, Canu (Koren et al., 2017) and  
136 metaFlye (Kolmogorov et al., 2020), providing 3 assemblies) we deduplicated the contigs using BB-Dedup  
137 using default parameters([sourceforge.net/projects/bbmap/](https://sourceforge.net/projects/bbmap/)) to only include unique sequences  
138 by removing redundant contigs. All contigs longer than 5 kb were retained for secondary metabolite  
139 production using antiSMASH v5.2.0 under strict settings to preclude the detection of false-positives (Blin  
140 et al., 2019). Here, biosynthetic gene clusters (BGCs) were retained if they were longer than 5 kb after  
141 manual inspection of the domain architecture. Finally, we compared the quantity of unique BGCs detected  
142 when clustering-then-assembling to assembly-only (metaFlye assembly only, as it produced the largest  
143 number of BGCs).

## 144 **3 RESULTS**

### 144 **3.1 Long reads increase clustering performance**

145 To test whether or not combining long reads with short reads improved clustering performance, we  
146 designed three strategies (Materials and Methods) to include long reads in SpaRC's LPA step (Figure 1A).  
147 We ran the three strategies on the synthetic BMock12 dataset (Materials and Methods) with 12 known  
148 genomes and used three metrics to measure read clustering performance: read cluster size (number of  
149 reads in a cluster), purity (percent of reads from the predominant genome in a cluster) and completeness  
150 (percent of reads from the predominant genome in a cluster). For these experiments, we used Illumina  
151 short reads and ONT long reads. Since we aimed at exploring how the long reads help with short reads  
152 clustering, these metrics were calculated based on short reads only. In addition, as we did not expect SpaRC  
153 to distinguish different strains of the same species, strain-level differences were ignored when clustering  
154 purity was calculated.

155 Figure 1B illustrates the cluster size comparison between these different label propagation strategies. The  
156 additive strategy (S1) produces many small clusters. Clusters formed from the mixed strategy (S2) showed  
157 a bi-modal size distribution, characterized by the presence of many larger clusters and small clusters. In  
158 contrast, the long-then-short strategy (S3) only produces a small number of clusters, most of them are  
159 very large. These strategies resulted in similar numbers of short reads in clusters (Table 3). However, the  
160 number of clusters was reduced from 85,398 (S1) to 136 (S3), while the mean cluster size was increased  
161 from 125.3 (S1) to 75,749.1 (S3). Consequently, the median completeness was increased from 0.25% (S1)  
162 to 79.42% (S3). As shown in Figure 1C, this increase of genome completeness by S3 was reflected in that  
163 the majority of clusters having better completeness, a significant shift from the other two strategies. These  
164 improvements in cluster size and completeness did not come with a decreased clustering purity, with a  
165 median purity 100% and a mean purity 99.65% (Figure 1C). Clustering performance of the long-then-short  
166 strategy also outperforms the mixed strategy in terms of completeness, number of clusters, and cluster size.

167 These results suggest that long reads can greatly improve metagenome read clustering performance and  
168 that the hybrid clustering strategy presented here is an effective way to solve the under-clustering problem  
169 with metagenomic short reads.

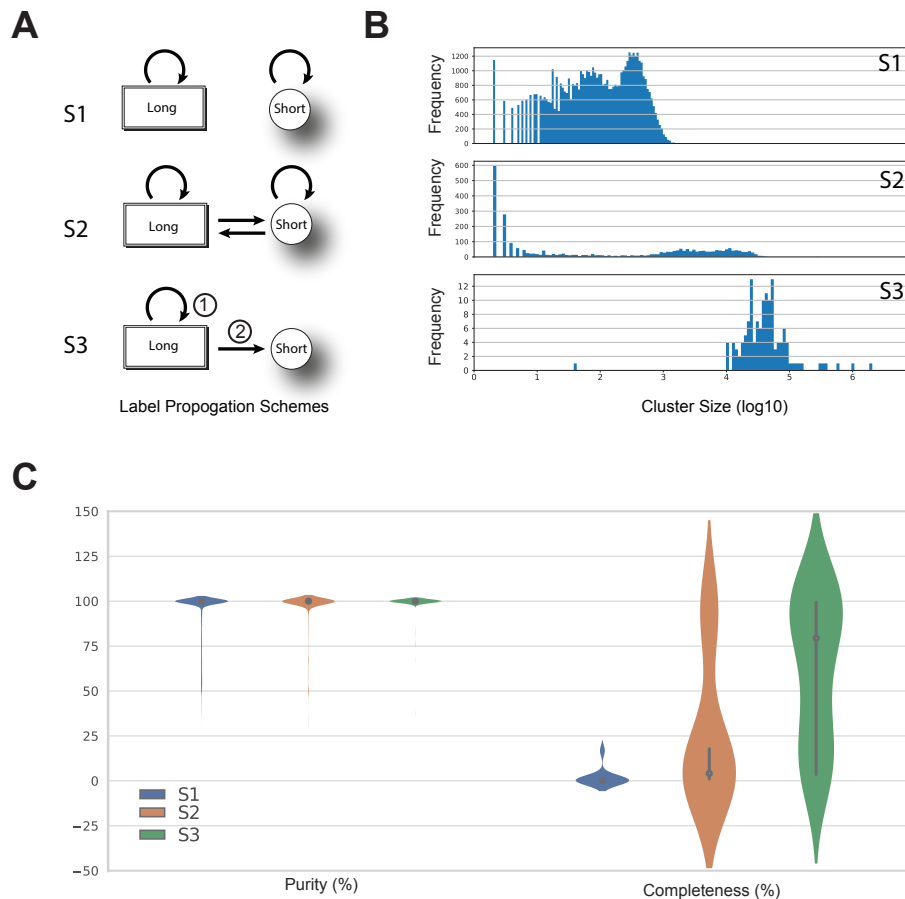

**Figure 1.** (A) Three alternative clustering strategies for hybrid-LPA. (S1) "Additive" strategy: clustering labels can only propagate among long reads or among short reads, respectively. No propagation was allowed between long and short reads. (S2) "Mixed" strategy: labels can be propagated among both long and short reads indiscriminately. (S3) "Long-then-short" strategy: in the first step, labels were only allowed to propagate among long reads, then they were propagated to short reads. No propagation was allowed among short reads. (B) A comparison of three label propagation strategies on cluster size improvement on the BMock12 dataset. The number of clusters (*Y-axis*) at each cluster size in log<sub>10</sub> (*X-axis*), from top to bottom: S1, S2, S3. (C) A comparison of three label propagation strategies on the purity and completeness of clusters on the BMock12 dataset. Violin plots of purity and completeness distributions are shown in percentage (*Y-axis*).

**Table 3. Clustering performance comparison between the three LPA strategies**

|    | #clusters | #reads     | % of reads clustered | mean cluster size | median completeness | median purity | mean purity |
|----|-----------|------------|----------------------|-------------------|---------------------|---------------|-------------|
| S1 | 85,398    | 10,312,376 | 96.38                | 125.3             | 0.25                | 100           | 97.90       |
| S2 | 15,145    | 10,312,376 | 96.38                | 706.5             | 4.13                | 100           | 94.62       |
| S3 | 136       | 10,298,222 | 96.25                | 75,749.1          | 79.42               | 100           | 99.65       |

170 Although long reads greatly reduce the under-clustering problem in the above experiment, they did not  
 171 solve the over-clustering problem, as some clusters contain reads from different genomes. Among the  
 172 top 20 largest clusters, 17 of them are pure clusters at the species level (Table 4). The biggest cluster,  
 173 consisting 2 million reads (20% of the clustered reads), mixed reads from two different closely-related  
 174 species (*Marinobacter sp.1* and *Marinobacter sp.8*) of the same genus (*Marinobacter*), owing to the fact

**Table 4. Top 20 cluster size and composition**

| cluster # | # reads in cluster | percentage of the total clustered reads (%) | cluster composition (species level)                                                                                                                                |
|-----------|--------------------|---------------------------------------------|--------------------------------------------------------------------------------------------------------------------------------------------------------------------|
| 1         | 2,053,694          | 19.54                                       | <i>Marinobacter sp.8</i> : 76%,<br><i>Marinobacter sp.1</i> : 24%                                                                                                  |
| 2         | 978,753            | 9.31                                        | <i>Cohaesibacter sp.</i> : 38%,<br><i>Thioclava sp.</i> : 30%,<br><i>Propionibact. b.</i> : 12%,<br><i>M. echinofusca</i> : 11%,<br><i>M. echinaurantiaca</i> : 9% |
| 3         | 583,575            | 5.55                                        | <i>Halomonas sp.</i> : 67%,<br><i>Psychrobacter sp.6</i> : 15%,<br><i>Marinobacter sp.8</i> : 7%,<br><i>Muricauda sp.</i> : 7%,<br>others: 4%                      |
| 4         | 396,548            | 3.77                                        | <i>Halomonas sp.</i> : 100%                                                                                                                                        |
| 5         | 350,579            | 3.34                                        | <i>Cohaesibacter sp.</i> : 100%                                                                                                                                    |
| 6         | 310,604            | 2.95                                        | <i>Halomonas sp.</i> : 100%                                                                                                                                        |
| 7         | 162,263            | 1.54                                        | <i>Psychrobacter sp.6</i> : 100%                                                                                                                                   |
| 8         | 141,331            | 1.34                                        | <i>Halomonas sp.</i> : 100%                                                                                                                                        |
| 9         | 127,583            | 1.21                                        | <i>Halomonas sp.</i> : 100%                                                                                                                                        |
| 10        | 118,194            | 1.12                                        | <i>Halomonas sp.</i> : 100%                                                                                                                                        |
| 11        | 101,535            | 0.97                                        | <i>Psychrobacter sp.6</i> : 100%                                                                                                                                   |
| 12        | 96,011             | 0.91                                        | <i>Halomonas sp.</i> : 100%                                                                                                                                        |
| 13        | 95,349             | 0.91                                        | <i>Halomonas sp.</i> : 100%                                                                                                                                        |
| 14        | 89,545             | 0.85                                        | <i>Halomonas sp.</i> : 100%                                                                                                                                        |
| 15        | 88,730             | 0.84                                        | <i>Halomonas sp.</i> : 100%                                                                                                                                        |
| 16        | 84,861             | 0.81                                        | <i>Halomonas sp.</i> : 100%                                                                                                                                        |
| 17        | 84,394             | 0.80                                        | <i>Psychrobacter sp.6</i> : 100%                                                                                                                                   |
| 18        | 82,854             | 0.79                                        | <i>Halomonas sp.</i> : 100%                                                                                                                                        |
| 19        | 82,168             | 0.78                                        | <i>Halomonas sp.</i> : 100%                                                                                                                                        |
| 20        | 82,083             | 0.78                                        | <i>Halomonas sp.</i> : 100%                                                                                                                                        |
| others    | 4,401,089          | 41.87                                       | /                                                                                                                                                                  |
| total     | 10,511,743         | 100.00                                      | /                                                                                                                                                                  |

175 that these species have an average nucleotide identity (ANI) of 78.1%, and they share 105,617 common  
 176 31-mers, making them difficult to be distinguished (Supplemental Table S1). As expected, the clustering  
 177 algorithm could not distinguish closely related strains of the same species, such as *Halomonas sp. HL-4*  
 178 and *Halomonas sp. HL-93*, with 3,126,579 shared 31-mers and an ANI of 98.5%. This pair of genomes  
 179 spread 14 of the top 20 clusters. Different species with a large number of shared k-mers could also get  
 180 clustered together, as the second and third largest clusters each contain multiple genomes. Some of these  
 181 genomes are related, but some are not clearly indicating an over-clustering problem.

### 182 **3.2 Small amounts of long-read data sufficiently improve clustering**

183 As long-read sequencing technologies have higher cost and lower throughput, we tested whether or not  
 184 limited numbers of long reads can help short-read metagenome clustering. In the following experiments  
 185 done on the BMock12 dataset, we gradually increased the amount of ONT reads added to Illumina reads  
 186 and compared the hybrid clustering performance.

187 As shown in Figure 2, adding just 1% ONT reads already produces a pronounced effect, increasing the  
 188 mean cluster size to over 50,000 reads. Except for some variations when below 10% of the ONT reads were  
 189 added, adding more ONT reads increases the mean cluster size, even though the increase gets smaller. The

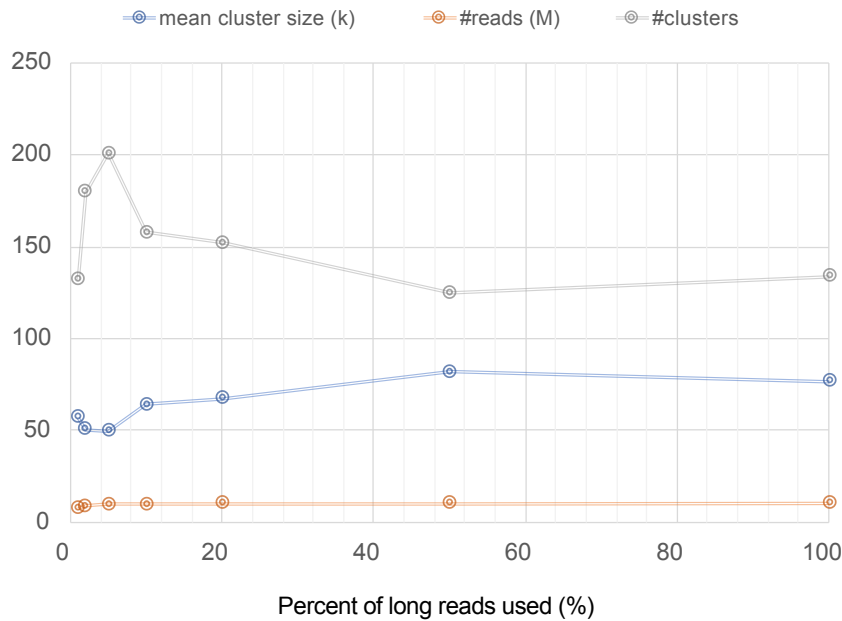

**Figure 2.** The effect of different amounts of ONT reads added to Illumina short reads on cluster size: the number of clusters (blue line), the number of reads being clustered in millions (M, grey line), and the mean cluster size in thousands (K, orange line) vary as different percentages of ONT long reads are added (*X-axis*)

190 total number of clusters first rises, then steadily falls after 5% ONT reads. The total number of clustered  
191 short reads remains largely unchanged. As we added more long reads (>10% of total), the number of reads  
192 clustered, the number of clusters formed, and the mean cluster size all become stable. These results suggest  
193 a small fraction of long reads can significantly improve short read clustering, and the hybrid clustering  
194 approach could be a cost-effective metagenome clustering method.

195

### 196 **3.3 Read length, not the sequencing platform, has a major impact on the cluster size**

197 In theory, longer read lengths should increase the clustering performance, as their ability to bridge  
198 short reads gets better with length. To test this hypothesis, we added shorter PacBio reads from the same  
199 BMock12 dataset and compared the results to the above obtained from ONT reads. The read length  
200 distribution of ONT and PacBio reads is shown in Figure 3A.

201 As expected, ONT read hybrid clustering gave much better results than those from PacBio reads. The  
202 number of clusters from the ONT experiment is 136, while the PacBio produced 1,502 clusters (Figure 3B).  
203 The corresponding genome completeness metrics were measured at 79.42% and 7.09% for ONT and  
204 PacBio, respectively. The size of the clusters produced by adding ONT reads is much larger than that of  
205 PacBio reads (Figure 3C). To investigate whether this difference is caused by different platforms rather  
206 than by different read lengths, we trimmed the ONT reads so that they have the same length distribution as  
207 the PacBio reads (Figure 3A) and then repeated the experiment. The number of clusters became 1,149 by  
208 adding the trimmed ONT reads, which is very similar to the results obtained from the PacBio reads. And  
209 the genome completeness for trimmed ONT was reduced to 10.91%. The cluster size distribution is also  
210 comparable to the results of PacBio experiment. In all three experiments, the median purity metrics of the  
211 clusters are comparable, ranging from 97.73%-100%. These results confirmed that the read length, rather  
212 than the long-read sequencing platform, has a major impact on clustering performance.



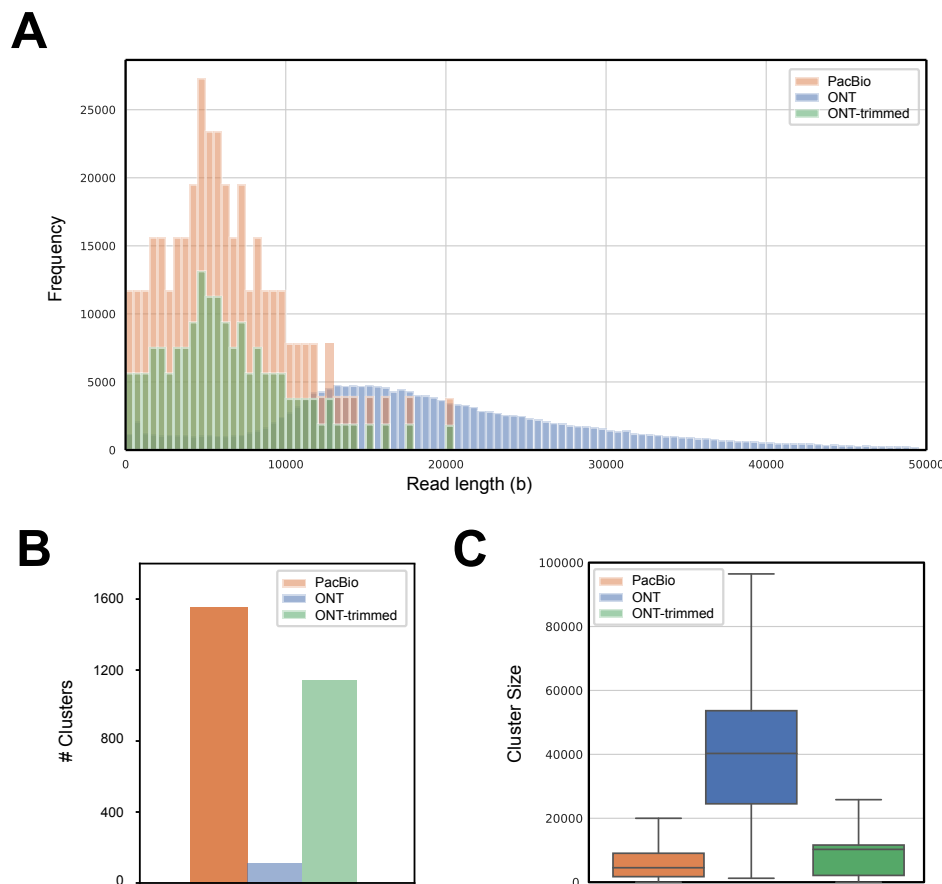

**Figure 3.** The dependency of hybrid clustering performance on read length. **(A)** Read length distribution of PacBio (orange), ONT (blue) and trimmed ONT (green) reads to match PacBio read length distribution in BMock12: the read length (*X-axis*) is plotted with its respective number of reads (*Y-axis*) for ONT and PacBio sequencing platforms. **(B)** The number of clusters from hybrid-LPA using PacBio, before and after trimming ONT. The number of clusters is much smaller in ONT than PacBio but becomes comparable after the trimming. **(C)** Box plots of cluster size from hybrid-LPA using PacBio, before and after trimming ONT. The cluster size (*Y-axis*) after trimming ONT read length is comparable to PacBio, both are much smaller than ONT.

### 213 3.4 Hybrid clustering improves downstream metagenome assembly and gene cluster 214 discovery

215 To investigate whether or not the improved clustering results produced by hybrid clustering can translate  
216 into better downstream applications, we used two common scenarios as examples. First, on the BMock12  
217 dataset where the set of genomes are known, we asked whether or not hybrid clustering produces better  
218 metagenome-assembled-genomes (MAGs). Second, we used a real-world Biocrust metagenome dataset  
219 without known references (Materials and Methods), and asked whether or not hybrid clustering could  
220 produce more predicted biosynthetic gene clusters (BGCs), locally clustered genes that together encode a  
221 biosynthetic pathway for the production of secondary metabolites (Medema et al., 2015). In both cases  
222 we wanted to compare the results to metagenome assembly with hybrid clustering (hereafter we refer as  
223 "SpaRC-hybrid") and without ("Assembly"). The steps in this two methods are otherwise identical except  
224 in the SpaRC-hybrid the assembly was done on the clusters instead of on raw reads. A schematic view of  
225 the two methods is shown in Figure 4A.

226 For the BMock12 dataset, the quality of genome bins were evaluated using Quast (Gurevich et al., 2013).  
227 Quast produces many metrics, here we focused on two assembly-related ones: the percent of genome  
228 coverage that measures the extent that a genome bin covers a reference genome, and percent of correctly  
229 assembled that measures the percent of assemblies aligned to references without any mis-assemblies  
230 (Figure 4B). Using 80% genome fractions and 90% correctness as cut-offs, the SpaRC-hybrid method  
231 produces 8 good genomes while the Assembly method only produced 4, supporting the notion that hybrid  
232 clustering improves downstream genome assembly. The full Quast report is available in Supplemental  
233 Table S2. Other differences between these two methods we noticed include SpaRC-hybrid producing much  
234 smaller N50s, higher rates of mismatches and small indels. These observations suggest the under-clustering  
235 problem still exists to some extent, so that the assemblers do not have sufficient read coverage for correcting  
236 the errors in long reads, or producing good contiguity.

237 For the Biocrust dataset, we used the ability to discover unique Biosynthetic Gene Clusters (BGCs) as  
238 a metric to test the benefit of hybrid-LPA over the Assembly method without prior clustering (Materials  
239 and Methods). Overall, the SpaRC-hybrid method predicted more BGCs than the Assembly method  
240 alone (Figure 4C). MetaFlye assembly derived from SpaRC-hybrid clusters gave 5,458 unique BGCs,  
241 considerably more than those from the Assembly approach (2,988 BGCs). In almost every category  
242 SpaRC-hybrid predicted more BGCs, with the most pronounced difference in Non-ribosomal peptides, a  
243 common and important class of secondary metabolites encoded by multidomain non-ribosomal peptide  
244 synthetases (NRPS). A complete list of the counts are available in Supplemental Table S3. The hybrid  
245 approach also predicted more complete gene clusters (i.e., it is not truncated on either of the contig edges)  
246 than the assembly-only approach, 1,100 vs 712 (Van Goethem et al., 2021). The longest NRPS is novel  
247 (based on sequence similarity to the entire NCBI nr database) and is a full-length gene cluster of 79,925 bp.

248 We made similar observations when we assembled the clusters using CANU instead of MetaFlye  
249 (Supplemental Table S3), suggesting hybrid clustering by SpaRC-LPA can benefit downstream assemblers  
250 in general.

## 4 DISCUSSION

251 In this work, we developed a new scalable algorithm, SpaRC-hybrid to incorporate long reads into  
252 metagenome read clustering. We showed that the hybrid clustering method can reduce the under-clustering  
253 problem in clustering experiments with only short reads. We also demonstrated that the read length, rather  
254 than the sequencing technologies, has a big impact on the clustering performance. Furthermore, improved  
255 clustering results can greatly augment downstream metagenome assembly or gene cluster discovery.

256 While SpaRC-hybrid can effectively leverage long reads to reduce the under-clustering problem in  
257 short reads, it does not reduce over-clustering problems, where similar genomes, or genomes sharing  
258 large genetic elements (horizontally transferred genes, very closely-related homologs, mobile elements,  
259 etc.) are clustered together. Given that SpaRC-hybrid uses long reads to build the initial read graph, it  
260 should alleviate the problem to some extent at this stage. However, over-clustering can still happen at  
261 the short-read recruitment stage. Using stringent read overlapping criteria may reduce the problem, but  
262 this may come with a cost of under-clustering and loss in sensitivity. In complex real-world metagenome  
263 datasets, this is unlikely to be a major drawback, as the overall complexity within a cluster could be greatly  
264 reduced compared to the original dataset. We may not be able to completely deconvolute a large, complex  
265 metagenome into single genomes, but can effectively partition into many simpler metagenomes. With the  
266 decreasing cost and increasing throughput of long-read sequencing, ultimately we may have to use only  
267 long reads for metagenome clustering to overcome the over-clustering problem.

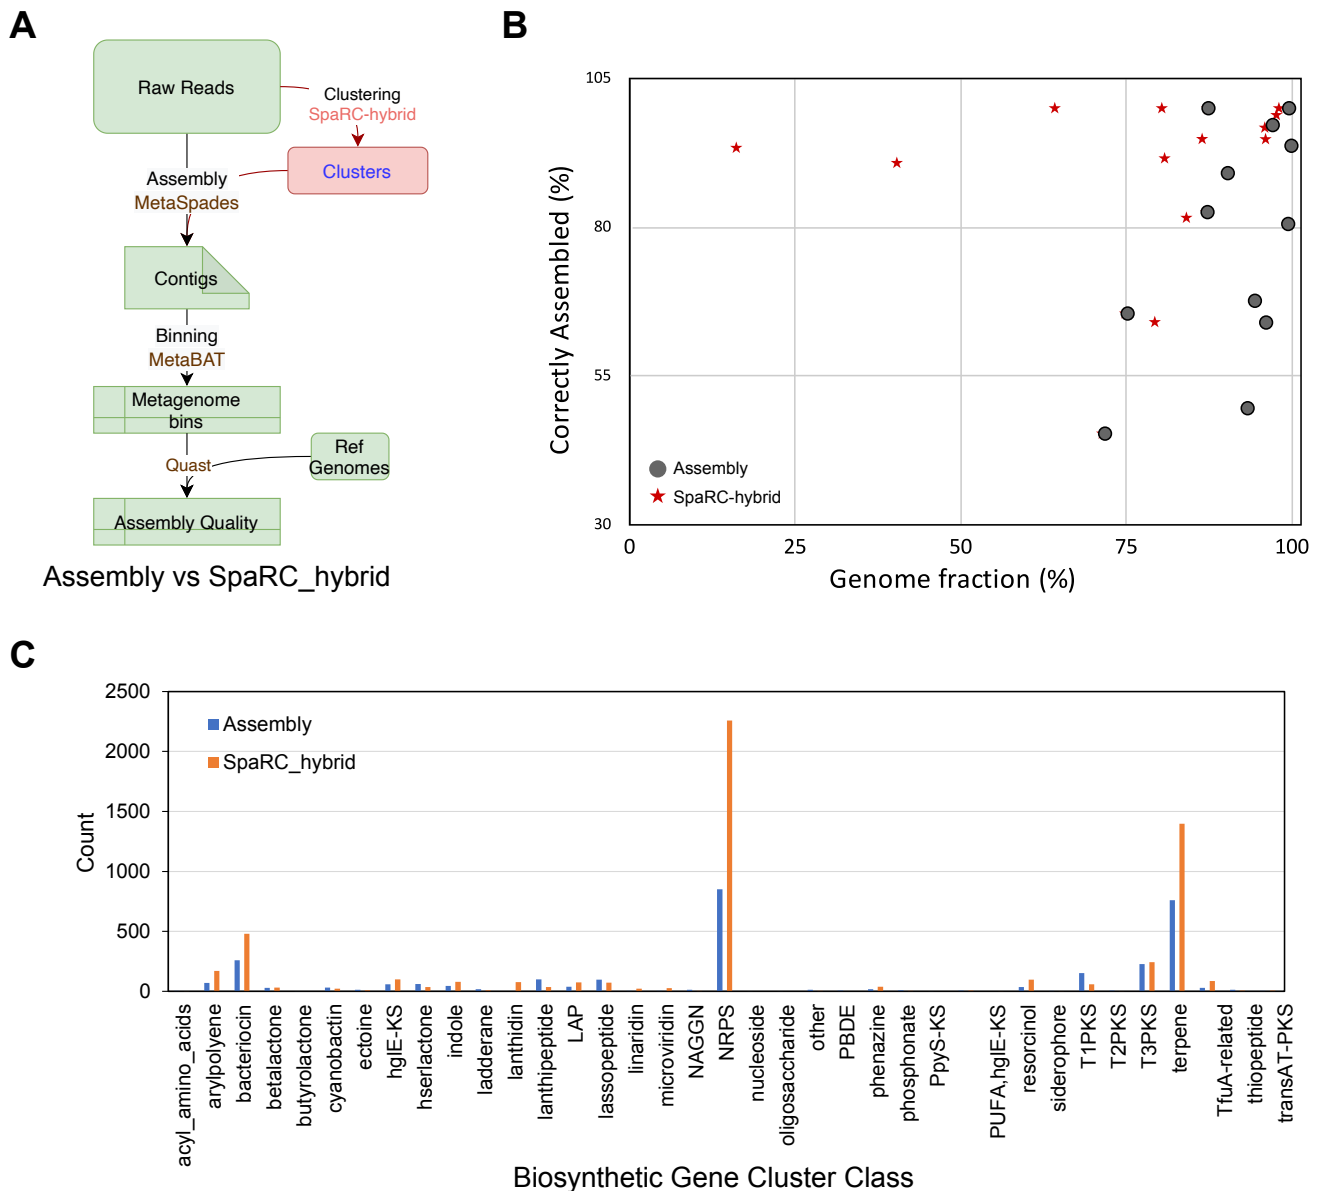

**Figure 4.** (A) A schematic view of metagenome hybrid assembly methods. Default "Assembly" method first assembles the raw reads (short and long) using an assembler (such as MetaSpades Nurk et al. (2017)), and then bins the resulting contigs into metagenome bins by a binner (such as MetaBAT Kang et al. (2015)). If reference genomes are available, the quality of the bins can be evaluated by Quast. The "SpaRC-hybrid" method first clusters the raw reads into clusters, then assembles the clusters into contigs, followed by the same procedures as the Assembly approach. (B) A comparison of assembled genome quality between the Assembly and SpaRC-hybrid approach on the BMock12 dataset. Two metrics measured by Quast, Genome Fraction percentage (*X-axis*) and percent of correctly assembled (*Y-axis*), are shown for each genome. Metrics for the Assembly method are shown in circles and the SpaRC-hybrid method in stars. (C) Bar charts of biosynthetic gene clusters (BGCs) predicted from the Biocrust dataset. Here we directly compared the difference in predicted BGCs counts for major BGC classes between assembly with metaFlye and our SpaRC-hybrid approach with the same assembler.

268 Currently, SpaRC-hybrid tends to produce a more fragmented assembly containing more small errors  
 269 (mismatches, small indels). The most likely cause for this problem is under-clustering, as reads from the  
 270 same genome were separated into different clusters. In the subsequent assembly step, each cluster does

271 not have sufficient read coverage for good contiguity, precluding the building of contigs. Some additional  
272 matrices may be needed to further reduce under-clustering. The small errors are likely those carried over  
273 from long read sequencing. In the control dataset, BMock12, there are only 12 species, applying an  
274 error-correction step by either using short reads to correct long reads, or using long reads to correct each  
275 other, should improve this problem. In real-world complex metagenome datasets error-correction may not  
276 be reliable, especially those with a large strain-level diversity. The recent PacBio high-fidelity reads may  
277 be used to avoid small errors, but at the expense of read-length reduction and more under-clustering.

## CONFLICT OF INTEREST STATEMENT

278 The authors declare that the research was conducted in the absence of any commercial or financial  
279 relationships that could be construed as a potential conflict of interest.

## AUTHOR CONTRIBUTIONS

280 The study was conceived by ZW. LS implemented the hybridLPA algorithm. YL, LS, and VS performed  
281 the BMock data analyses. MWVG and LS performed the Biocrust analysis. All authors contributed to the  
282 writing and editing of the manuscript and approved the submitted version.

## FUNDING

283 The work was supported by the National Natural Science Foundation of China (No. 61802246) and the 111  
284 Project (No. D18003). Marc W. Van Goethem, Volkan Sevim and Zhong Wang's work was supported by  
285 the U.S. Department of Energy, Office of Science, Office of Biological and Environmental Research under  
286 Contract No. DE-AC02-05CH11231

## DISCLAIMER

287 No approval or endorsement of any commercial product by the National Institute of Standards and  
288 Technology is intended or implied. Certain commercial software, products, and systems are identified  
289 in this report to facilitate better understanding. Such identification does not imply recommendations or  
290 endorsement by NIST, nor does it imply that the software and products identified are necessarily the best  
291 available for the purpose.

## ACKNOWLEDGMENTS

292 We thank the scientific computing group at Berkeley lab, especially Dr. Shawfeng "Shaw" Dong and Dr.  
293 Wei Feinstein for their support to run SpaRC on Lawrencium. We thank members of NERSC, for their  
294 support to run SpaRC on the Cori system.

## REFERENCES

- 295 Arumugam, M., Raes, J., Pelletier, E., Le Paslier, D., Yamada, T., Mende, D. R., et al. (2011). Enterotypes  
296 of the human gut microbiome. *nature* 473, 174–180
- 297 Bertrand, D., Shaw, J., Kalathiyappan, M., Ng, A. H. Q., Kumar, M. S., Li, C., et al. (2019). Hybrid  
298 metagenomic assembly enables high-resolution analysis of resistance determinants and mobile elements  
299 in human microbiomes. *Nature biotechnology* 37, 937–944
- 300 Blin, K., Shaw, S., Steinke, K., Villebro, R., Ziemert, N., Lee, S. Y., et al. (2019). antimash 5.0: updates to  
301 the secondary metabolite genome mining pipeline. *Nucleic acids research* 47, W81–W87
- 302 Breitwieser, F. P., Lu, J., and Salzberg, S. L. (2019). A review of methods and databases for metagenomic  
303 classification and assembly. *Briefings in bioinformatics* 20, 1125–1136

- 304 [Dataset] Bremges, A. and McHardy, A. C. (2018). Critical assessment of metagenome interpretation  
305 enters the second round.
- 306 Bushnell, B., Rood, J., and Singer, E. (2017). Bbmerge—accurate paired shotgun read merging via overlap.  
307 *PloS one* 12, e0185056
- 308 Chin, C.-S., Alexander, D. H., Marks, P., Klammer, A. A., Drake, J., Heiner, C., et al. (2013). Nonhybrid,  
309 finished microbial genome assemblies from long-read smrt sequencing data. *Nature methods* 10,  
310 563–569
- 311 Dmitry, Antipov, Anton, Korobeynikov, Jeffrey, S, et al. (2016). hybridspades: an algorithm for hybrid  
312 assembly of short and long reads. *Bioinformatics*
- 313 Eid, J., Fehr, A., Gray, J., Luong, K., Lyle, J., Otto, G., et al. (2009). Real-time dna sequencing from single  
314 polymerase molecules. *Science* 323, 133–138
- 315 Gurevich, A., Saveliev, V., Vyahhi, N., and Tesler, G. (2013). Quast: quality assessment tool for genome  
316 assemblies. *Bioinformatics* 29, 1072–1075
- 317 Hess, M., Sczyrba, A., Egan, R., Kim, T.-W., Chokhawala, H., Schroth, G., et al. (2011). Metagenomic  
318 discovery of biomass-degrading genes and genomes from cow rumen. *Science* 331, 463–467
- 319 Hofmeyr, S., Egan, R., Georganas, E., Copeland, A. C., Riley, R., Clum, A., et al. (2020). Terabase-scale  
320 metagenome coassembly with metahipmer. *Scientific reports* 10, 1–11
- 321 Hugenholtz, P. and Tyson, G. W. (2008). Metagenomics. *Nature* 455, 481–483
- 322 Kang, D. D., Froula, J., Egan, R., and Zhong, W. (2015). Metabat, an efficient tool for accurately  
323 reconstructing single genomes from complex microbial communities. *PeerJ* 3, e1165
- 324 Kang, D. D., Li, F., Kirton, E., Thomas, A., Egan, R., An, H., et al. (2019). Metabat 2: an adaptive binning  
325 algorithm for robust and efficient genome reconstruction from metagenome assemblies. *PeerJ* 7, e7359
- 326 Kolmogorov, M., Bickhart, D. M., Behsaz, B., Gurevich, A., Rayko, M., Shin, S. B., et al. (2020). metaflye:  
327 scalable long-read metagenome assembly using repeat graphs. *Nature Methods* 17, 1103–1110
- 328 Koren, S. and Phillippy, A. M. (2015). One chromosome, one contig: complete microbial genomes from  
329 long-read sequencing and assembly. *Current opinion in microbiology* 23, 110–120
- 330 Koren, S., Walenz, B. P., Berlin, K., Miller, J. R., Bergman, N. H., and Phillippy, A. M. (2017). Canu:  
331 scalable and accurate long-read assembly via adaptive k-mer weighting and repeat separation. *Genome*  
332 *research* 27, 722–736
- 333 Li, D., Liu, C. M., Luo, R., Kuniyoshi, S., and Tak-Wah, L. (2015). Megahit: an ultra-fast single-node  
334 solution for large and complex metagenomics assembly via succinct de bruijn graph. *Bioinformatics* 31,  
335 1674–1676
- 336 Li, K., Lu, Y., Deng, L., Wang, L., and Wang, Z. (2020). Deconvolute individual genomes from  
337 metagenome sequences through short read clustering. *PeerJ* 8, e8966
- 338 Logsdon, G. A., Vollger, M. R., and Eichler, E. E. (2020). Long-read human genome sequencing and its  
339 applications. *Nature Reviews Genetics* , 1–18
- 340 Medema, M. H., Kottmann, R., Yilmaz, P., Cummings, M., Biggins, J. B., Blin, K., et al. (2015). Minimum  
341 information about a biosynthetic gene cluster. *Nature chemical biology* 11, 625–631
- 342 Mikheenko, A., Saveliev, V., and Gurevich, A. (2016). Metaquast: evaluation of metagenome assemblies.  
343 *Bioinformatics* 32, 1088–1090
- 344 Nayfach, S., Roux, S., Seshadri, R., Udwy, D., Varghese, N., Schulz, F., et al. (2020). A genomic catalog  
345 of earth’s microbiomes. *Nature Biotechnology* , 1–11
- 346 Nurk, S., Meleshko, D., Korobeynikov, A., and Pevzner, P. A. (2017). metaspades: a new versatile  
347 metagenomic assembler. *Genome research* 27, 824–834

- 348 Parks, D. H., Rinke, C., Chuvochina, M., Chaumeil, P.-A., Woodcroft, B. J., Evans, P. N., et al. (2017).  
349 Recovery of nearly 8,000 metagenome-assembled genomes substantially expands the tree of life. *Nature*  
350 *microbiology* 2, 1533–1542
- 351 Raghavan, U. N., Albert, R., and Kumara, S. (2007). Near linear time algorithm to detect community  
352 structures in large-scale networks. *Physical review E* 76, 036106
- 353 Schneider, G. F. and Dekker, C. (2012). Dna sequencing with nanopores. *Nature biotechnology* 30,  
354 326–328
- 355 Sczyrba, A., Hofmann, P., Belmann, P., Koslicki, D., Janssen, S., Dröge, J., et al. (2017). Critical  
356 assessment of metagenome interpretation—a benchmark of metagenomics software. *Nature methods* 14,  
357 1063
- 358 Sevim, V., Lee, J., Egan, R., Clum, A., Hundley, H., Lee, J., et al. (2019). Shotgun metagenome data of a  
359 defined mock community using Oxford Nanopore, PacBio and Illumina, technologies. *Scientific data* 6,  
360 285–293
- 361 Shi, L., Meng, X., Tseng, E., Mascagni, M., and Wang, Z. (2018). Sparc: scalable sequence clustering  
362 using apache spark. *Bioinformatics* 35, 760–768
- 363 Stewart, R. D., Auffret, M. D., Warr, A., Walker, A. W., Roehe, R., and Watson, M. (2019). Compendium  
364 of 4,941 rumen metagenome-assembled genomes for rumen microbiome biology and enzyme discovery.  
365 *Nature biotechnology* 37, 953
- 366 Tyson, G. W., Chapman, J., Hugenholtz, P., Allen, E. E., Ram, R. J., Richardson, P. M., et al. (2004).  
367 Community structure and metabolism through reconstruction of microbial genomes from the environment.  
368 *Nature* 428, 37–43
- 369 Van Goethem, M. W., Osborn, A. R., Bowen, B., Andeer, P. F., Swenson, T. L., Clum, A., et al. (2021).  
370 Long-read metagenomics of soil communities reveals phylum-specific secondary metabolite dynamics.  
371 *bioRxiv* doi:10.1101/2021.01.23.426502
- 372 White, R. A., Bottos, E. M., Chowdhury, T. R., Zucker, J. D., Brislawn, C. J., Nicora, C. D., et al.  
373 (2016). Moleculo long-read sequencing facilitates assembly and genomic binning from complex soil  
374 metagenomes. *MSystems* 1
- 375 Wick, R. R., Judd, L. M., Gorrie, C. L., and Holt, K. E. (2017). Unicycler: resolving bacterial genome  
376 assemblies from short and long sequencing reads. *PLoS computational biology* 13, e1005595
- 377 Wommack, K. E., Bhavsar, J., and Ravel, J. (2008). Metagenomics: read length matters. *Applied and*  
378 *environmental microbiology* 74, 1453–1463
- 379 Xu, J. (2006). Invited review: microbial ecology in the age of genomics and metagenomics: concepts, tools,  
380 and recent advances. *Molecular ecology* 15, 1713–1731
- 381 Zimin, A. V., Marçais, G., Puiu, D., Roberts, M., Salzberg, S. L., and Yorke, J. A. (2013). The masurca  
382 genome assembler. *Bioinformatics* 29, 2669–2677

**A**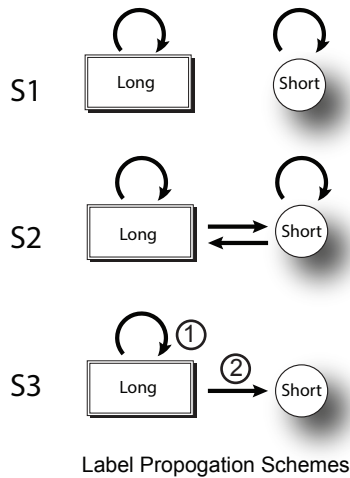**B**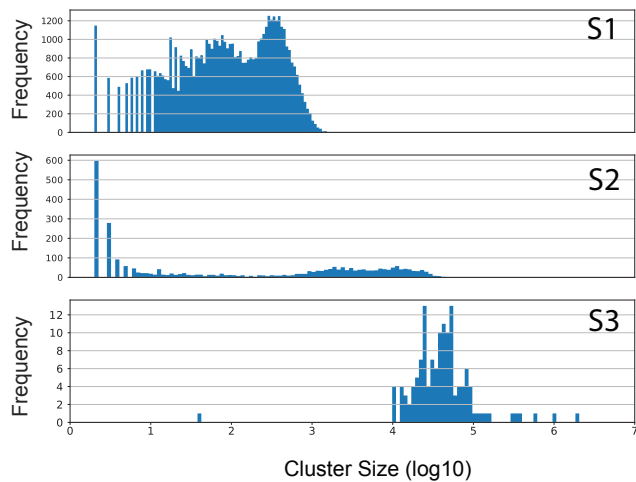**C**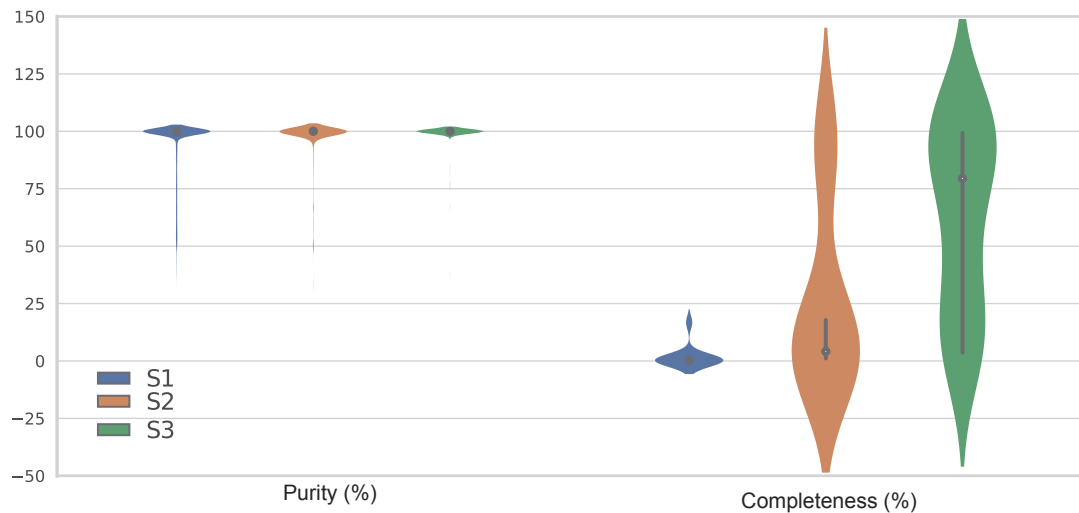

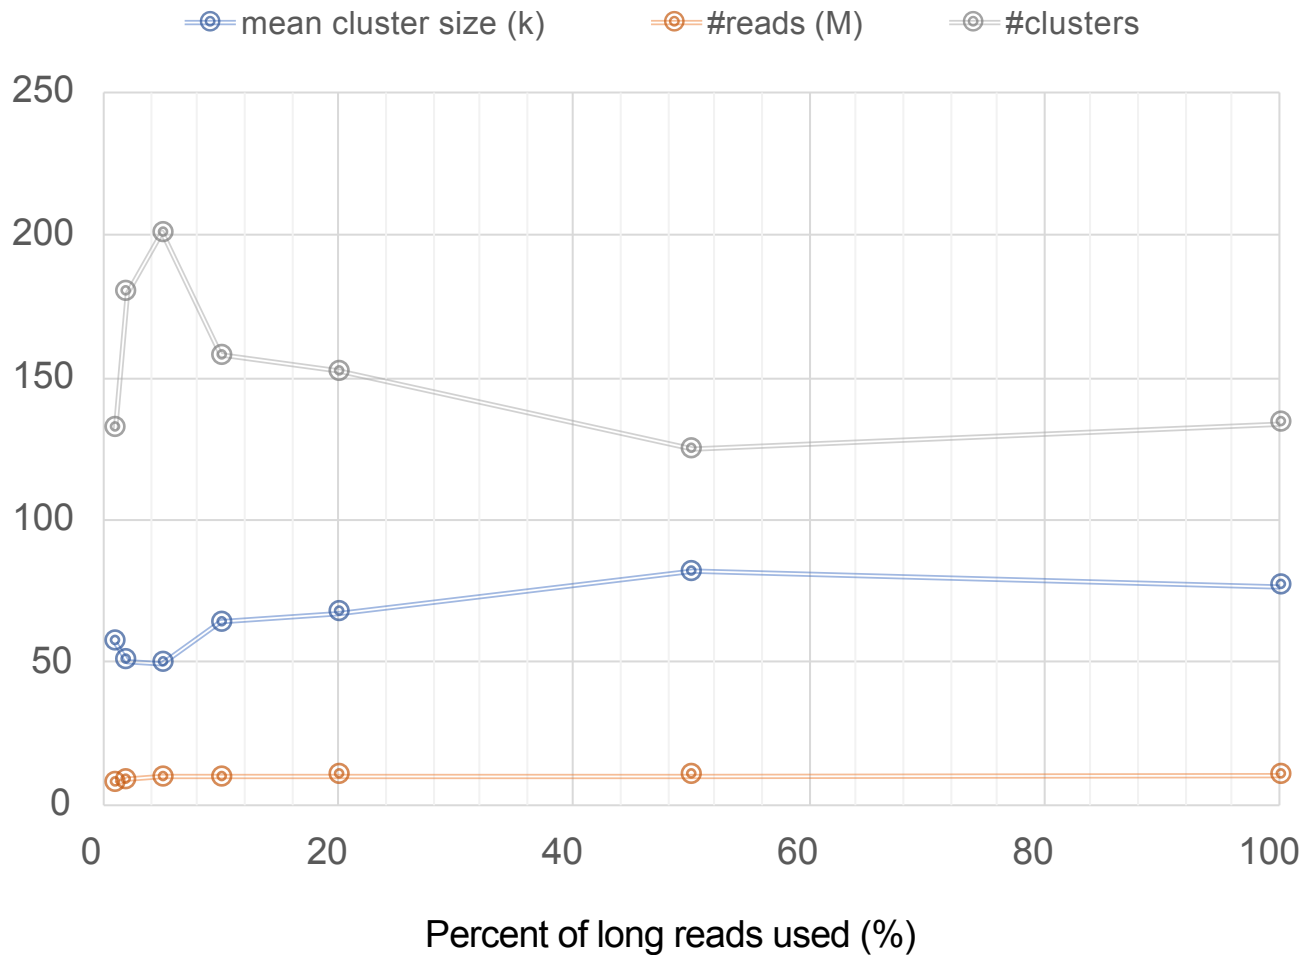



**A**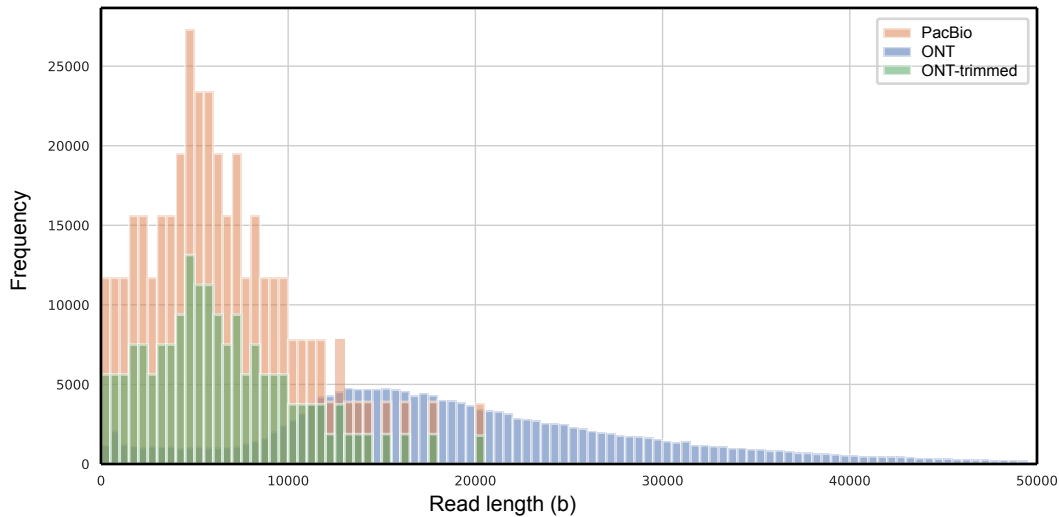**B**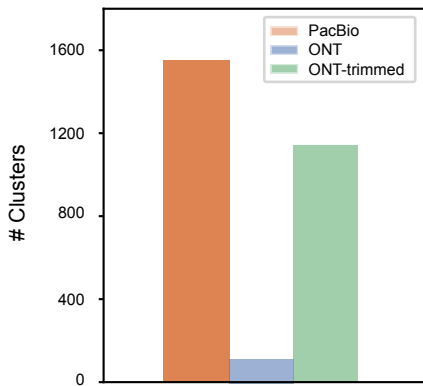**C**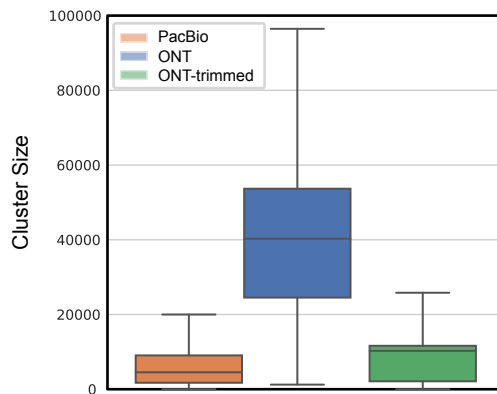

**A**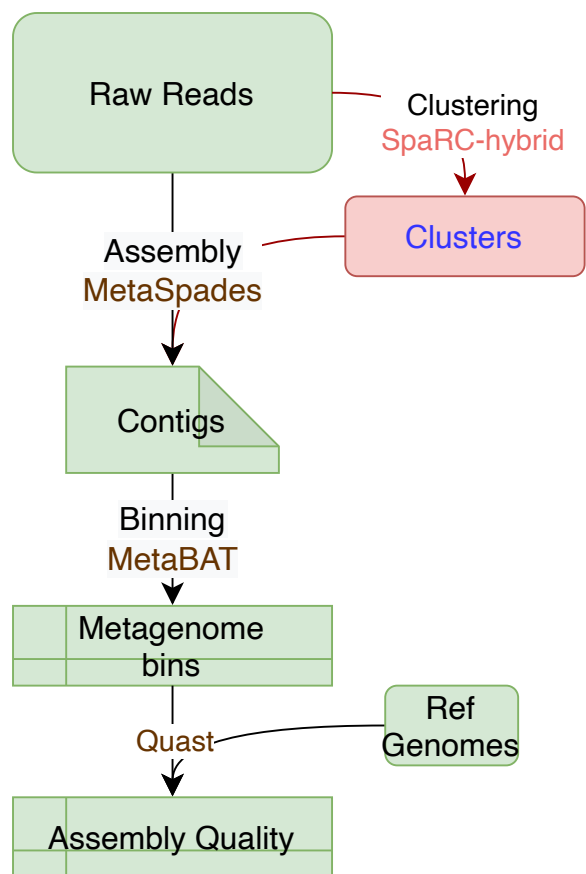

Assembly vs SpaRC\_hybrid

**B**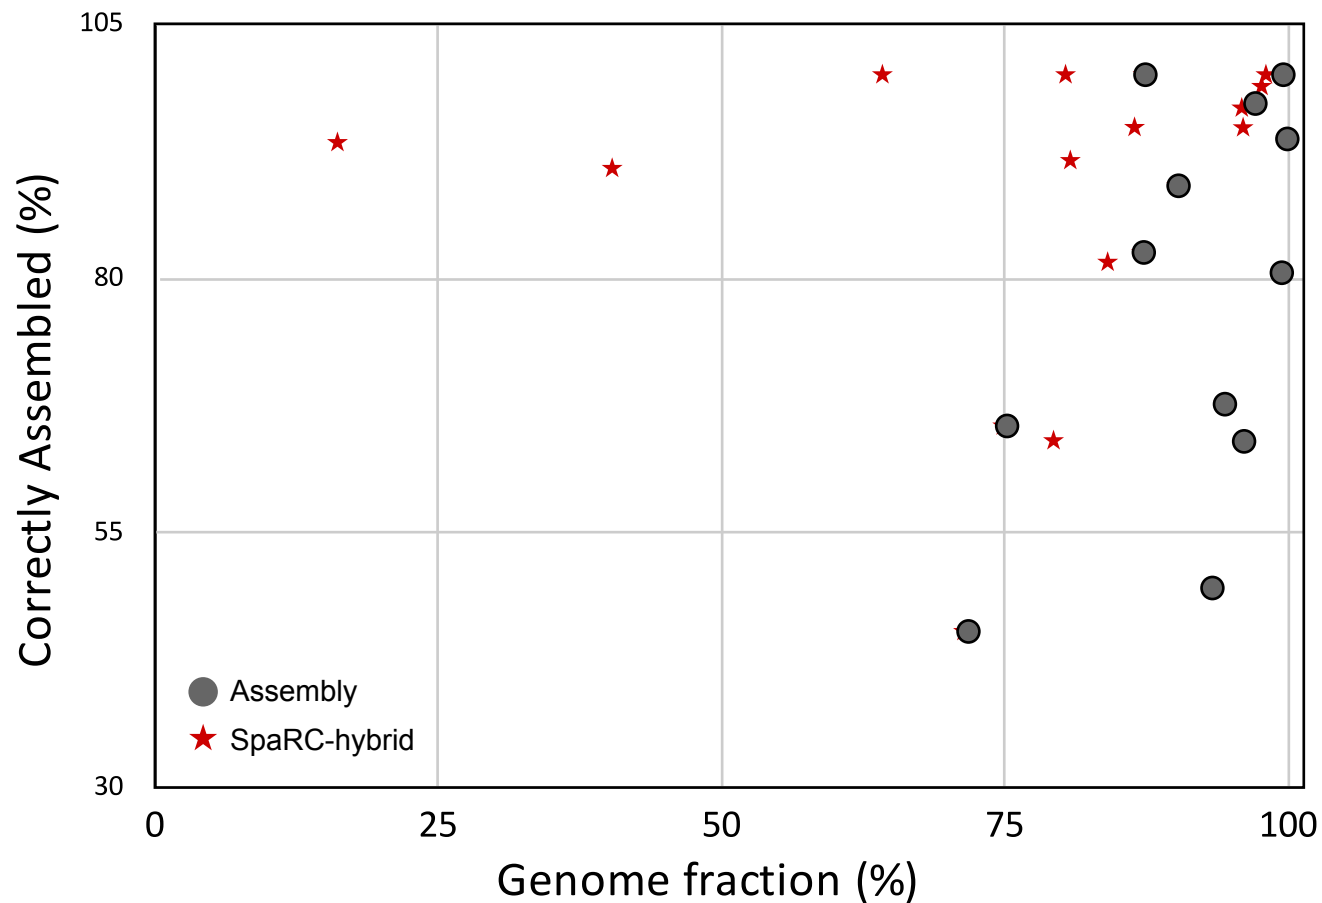**C**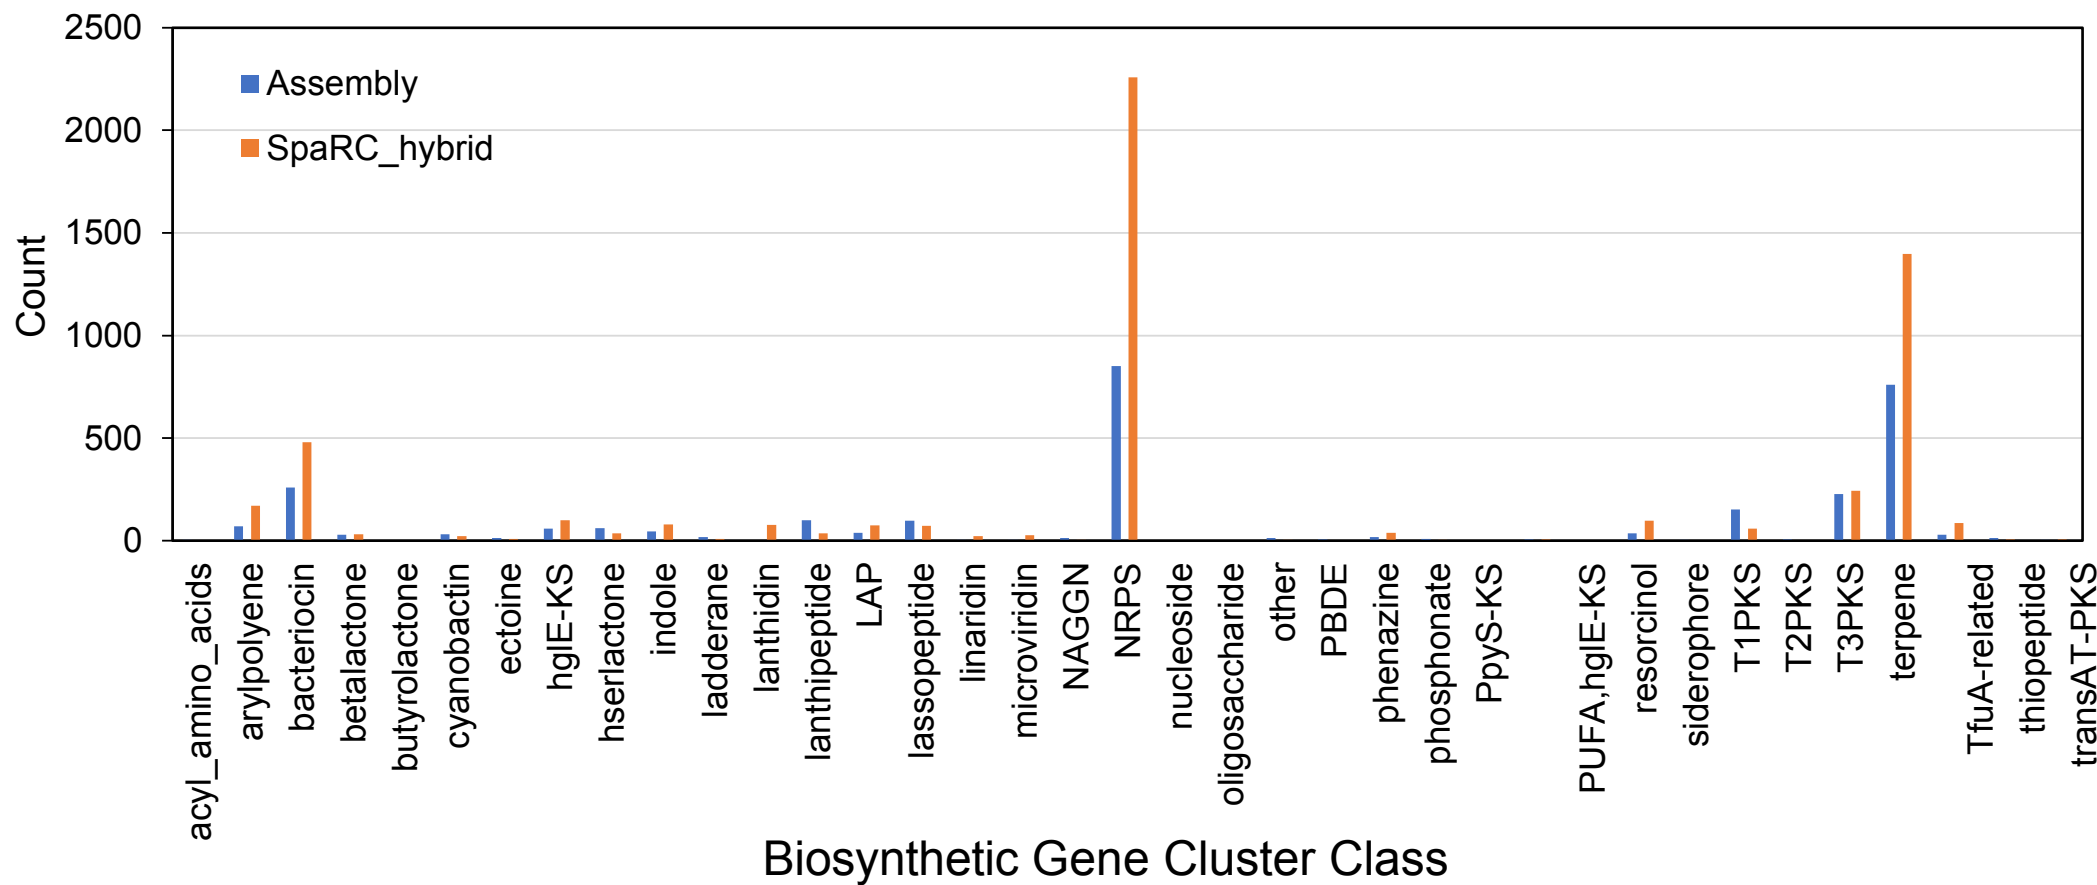

Source: https://www.biorxiv.org/content/10.1101/2021.01.25.428115v1.full.pdf
